# Supplementary material for: Proteome-wide survey of the autoimmune target repertoire in autoimmune polyendocrine syndrome type 1
Source: PubMed Central journal article supplement (PMC4735587; doi:10.1038/srep20104), 2016-02-01
Supplement: srep20104-s1.pdf [file srep20104-s1.pdf]

## Supplementary material

Proteome-wide survey of the autoimmune target repertoire in  
autoimmune polyendocrine syndrome type 1

\*Nils Landegren<sup>1,2</sup>, Donald Sharon<sup>3,4</sup>, Eva Freyhult<sup>2,5,6</sup>, Åsa Hallgren<sup>1,2</sup>, Daniel Eriksson<sup>1,2</sup>, Per-Henrik Edqvist<sup>7</sup>, Sophie Bensing<sup>8</sup>, Jeanette Wahlberg<sup>9</sup>, Lawrence M. Nelson<sup>10</sup>, Jan Gustafsson<sup>11</sup>, Eystein S Husebye<sup>12</sup>, Mark S Anderson<sup>13</sup>, Michael Snyder<sup>3</sup>, Olle Kämpe<sup>1,2</sup>

Nils Landegren and Donald Sharon contributed equally to the work

## Affiliations

<sup>1</sup>Department of Medicine (Solna), Karolinska University Hospital, Karolinska Institutet, Sweden

<sup>2</sup>Science for Life Laboratory, Department of Medical Sciences, Uppsala University, Sweden

<sup>3</sup>Department of Genetics, Stanford University, California, USA

<sup>4</sup>Department of Molecular, Cellular, and Developmental Biology, Yale University, Connecticut, USA

<sup>5</sup>Department of Medical Sciences, Cancer Pharmacology and Computational Medicine, Uppsala University

<sup>6</sup>Bioinformatics Infrastructure for Life Sciences

<sup>7</sup>Department of Immunology, Genetics and Pathology, Uppsala University, Sweden and Science for Life Laboratory

<sup>8</sup> Department of Molecular Medicine and Surgery, Karolinska Institutet, Stockholm, Sweden

<sup>9</sup>Department of Endocrinology and Department of Medical and Health Sciences and Department of Clinical and Experimental Medicine, Linköping University, Linköping, Sweden

<sup>10</sup>Integrative Reproductive Medicine Group, Intramural Research Program on Reproductive and Adult Endocrinology, National Institute of Child Health and Human Development, National Institutes of Health, Bethesda, MD 20892, USA.

<sup>11</sup>Department of Women's and Children's Health, *Uppsala University, Sweden*

<sup>12</sup>Department of Clinical Science, University of Bergen, and Department of Medicine, Haukeland University Hospital, Bergen, Norway

<sup>13</sup>Diabetes Center, University of California San Francisco, USA

\*Correspondence should be addressed to

Nils Landegren

[nils.landegren@ki.se](mailto:nils.landegren@ki.se)

Department of Medicine Solna, Karolinska Institute

Experimental endocrinology

Center for Molecular Medicine, L8:01, Karolinska University Hospital

SE-171 76 Stockholm

[nils.landegren@ki.se](mailto:nils.landegren@ki.se)

phone: +46851779158

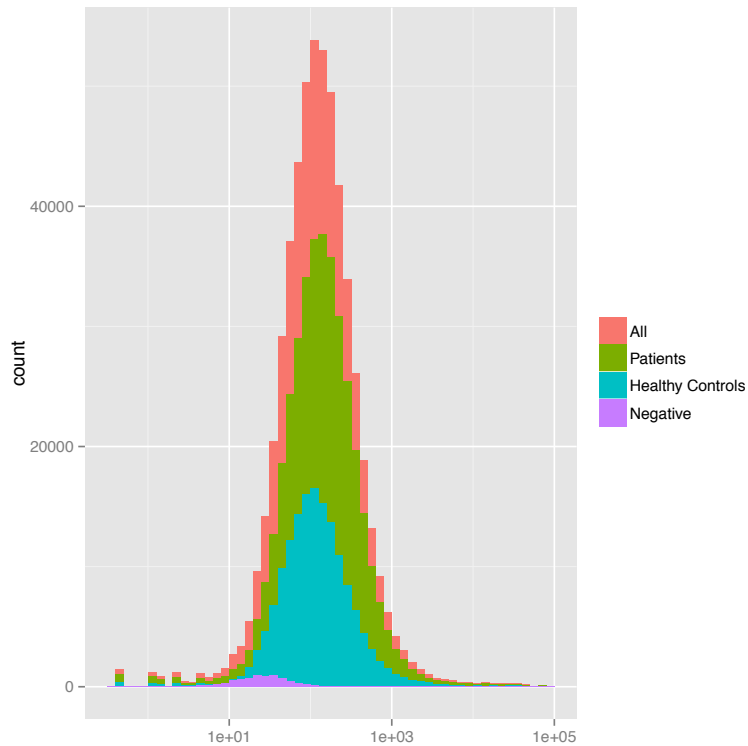

Fig. S1. Distribution of log-intensities for arrays probed with patient sera, healthy control sera or without serum sample (Negative).

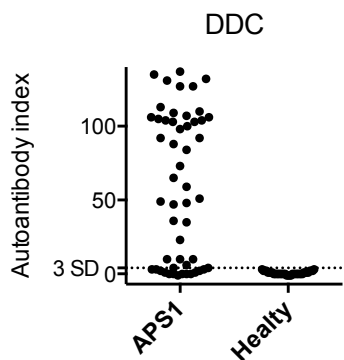

Fig. S2. The proteome array results for DDC autoantibody detection were validated using a radio-ligand binding assay (RLBA) in the 51 patients from the APS1 discovery cohort and in 39 healthy controls. The upper limit of the normal range was defined as three standard deviations above the average of the healthy controls.

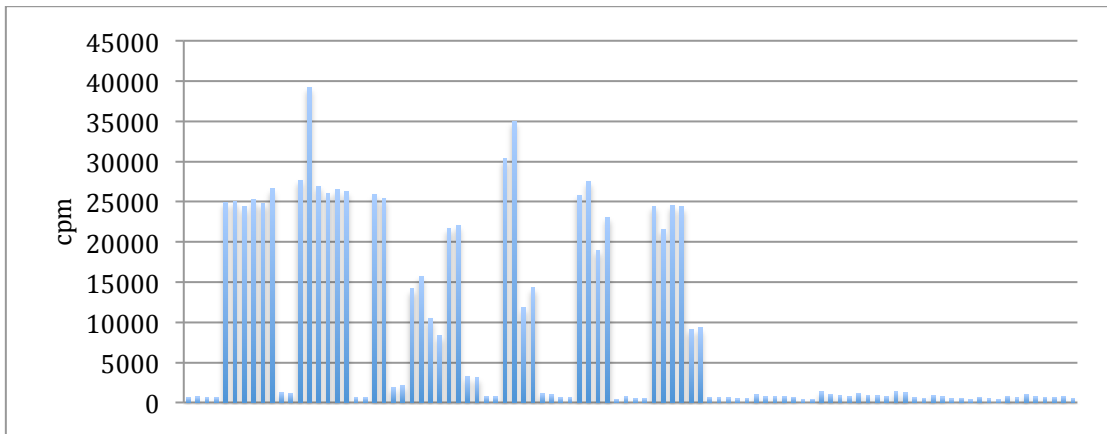

Fig. S3. Representative raw data from the DDC autoantibody radio-ligand binding assay. All patient and control samples were analyzed in duplicate. Negative control (bar 1-4), positive control (bar 5-8), patients with APS1 (bar 9-68) and healthy control subjects (bar 69-96). Counts per minute (CPM).

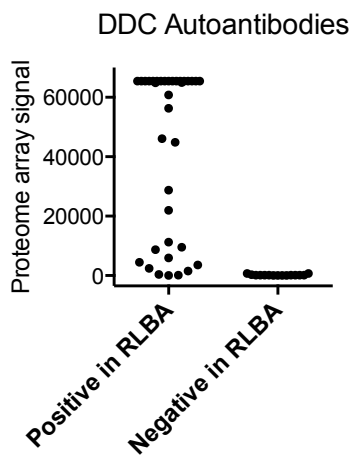

Fig. S4. The proteome array results for DDC were compared against the results from the radio-ligand binding assay (RLBA) for the 51 patients in the APS1 discovery cohort. Patients who were positive for DDC autoantibodies in the RLBA are grouped to the left (cut-off = average of the healthy + 3SD). Proteome array signals are

represented as the average fluorescence signal intensities for protein duplicates on the array after subtraction of the background signal.

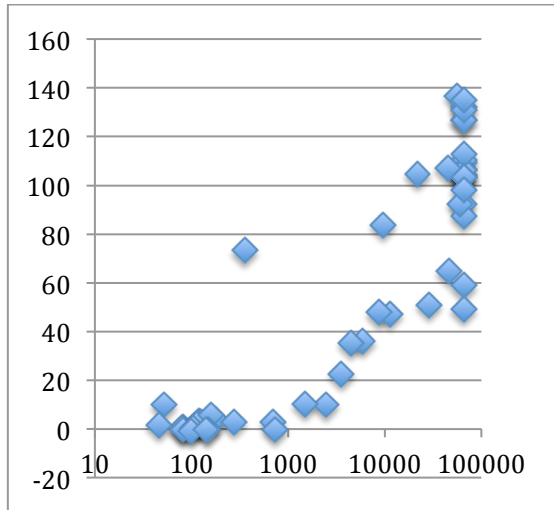

Fig. S5. The proteome array results for DDC were compared against the results from the radio-ligand binding assay (RLBA) for the 51 patients in the APS1 discovery cohort. Proteome array signal results are shown on the x-axis and RLBA results on the y-axis. Proteome array signals are represented as the average fluorescence signal intensities for protein duplicates on the array after subtraction of the background signal. RLBA results are shown as autoantibody index values.

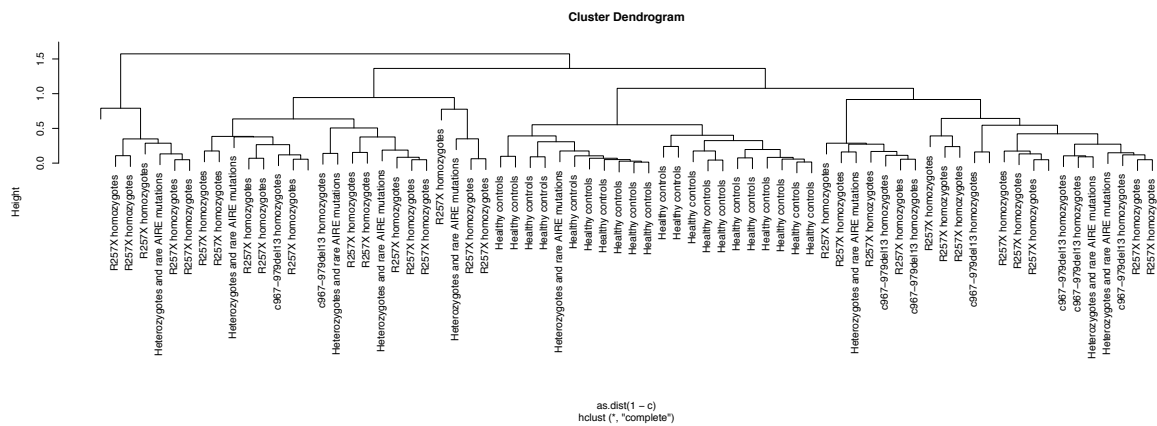

Fig. S6. Patients with APS1 and healthy controls were clustered based on Spearman correlations for the known autoantigens; glutamate decarboxylase 2 (GAD2), glutamate decarboxylase 1 (GAD1), tryptophan hydroxylase (TPH1), aromatic L-amino acid decarboxylase (DDC), gastric intrinsic factor (GIF), cytochrome P450, family 1, subfamily A, polypeptide 2 (CYP1A2), potassium channel regulator (KCNRG), testis specific 10 (TSGA10), interleukin 22 (IL22), interleukin 17A (IL17A), interferon omega (IFNW1) and interferon alpha 1 (IFNA1). Distance = 1 – correlation.

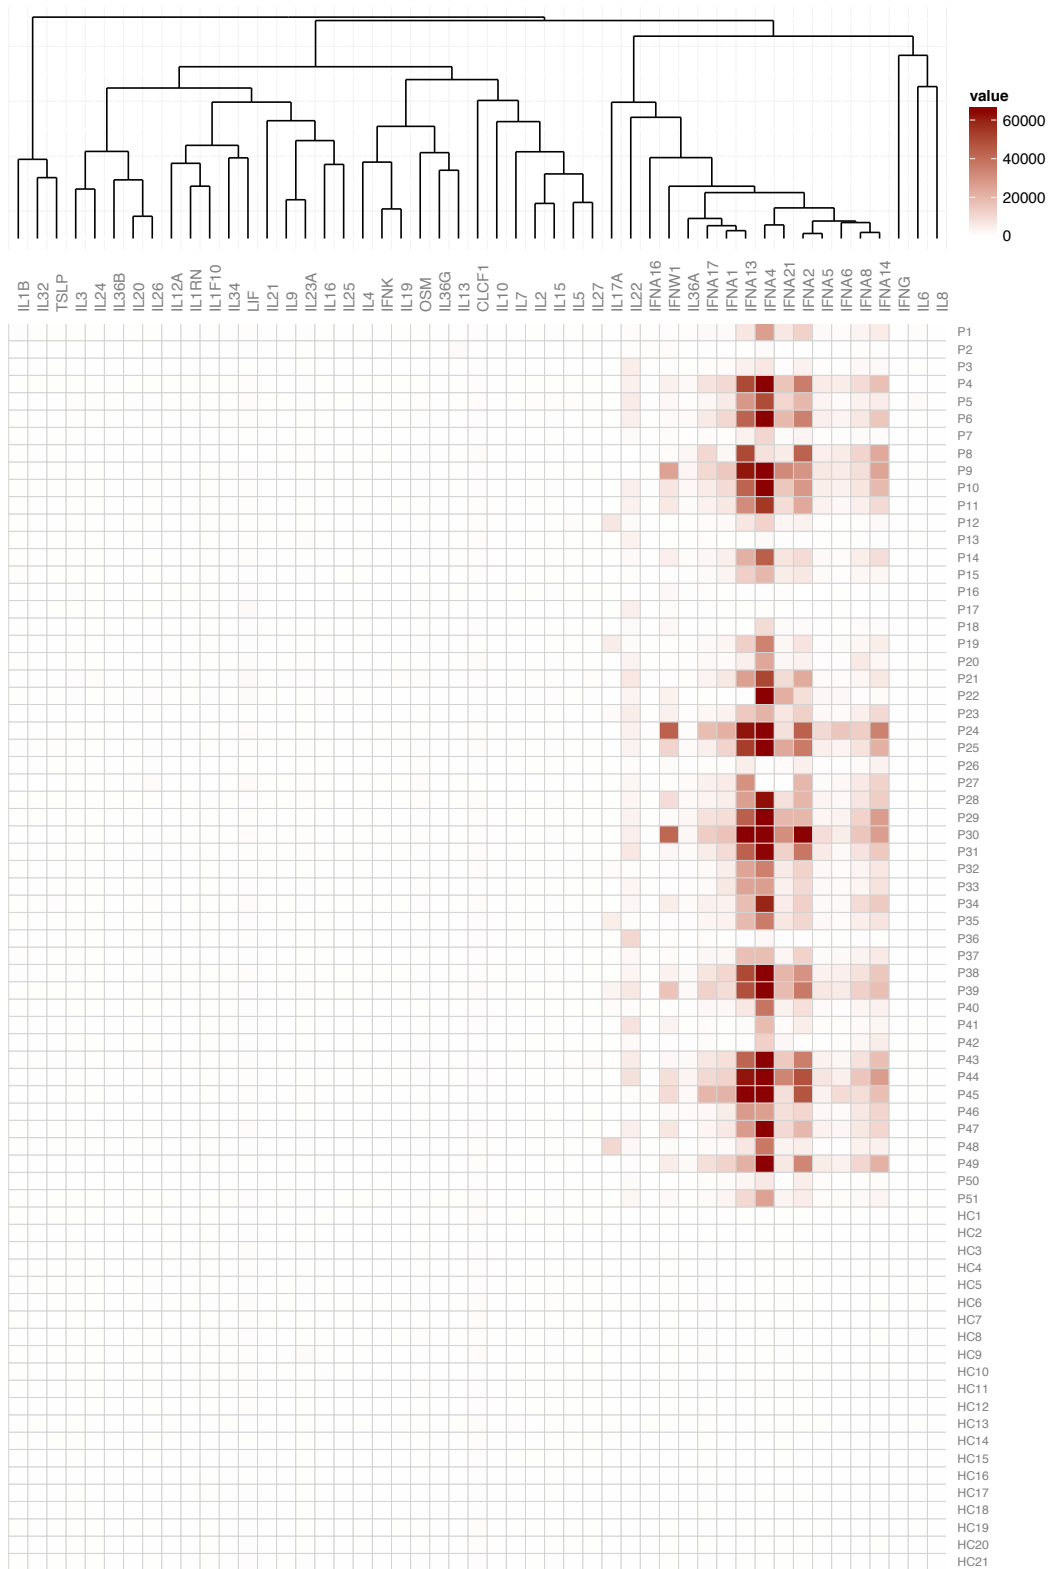

Fig. S7. Focused investigation of 49 interferons, interleukins and other closely related cytokines. High autoantibody signals were seen specifically for the previously



established immune targets, including multiple alpha interferon specificities, IFNW1, IL22 and IL17A (IL17F was not present in the array panel)

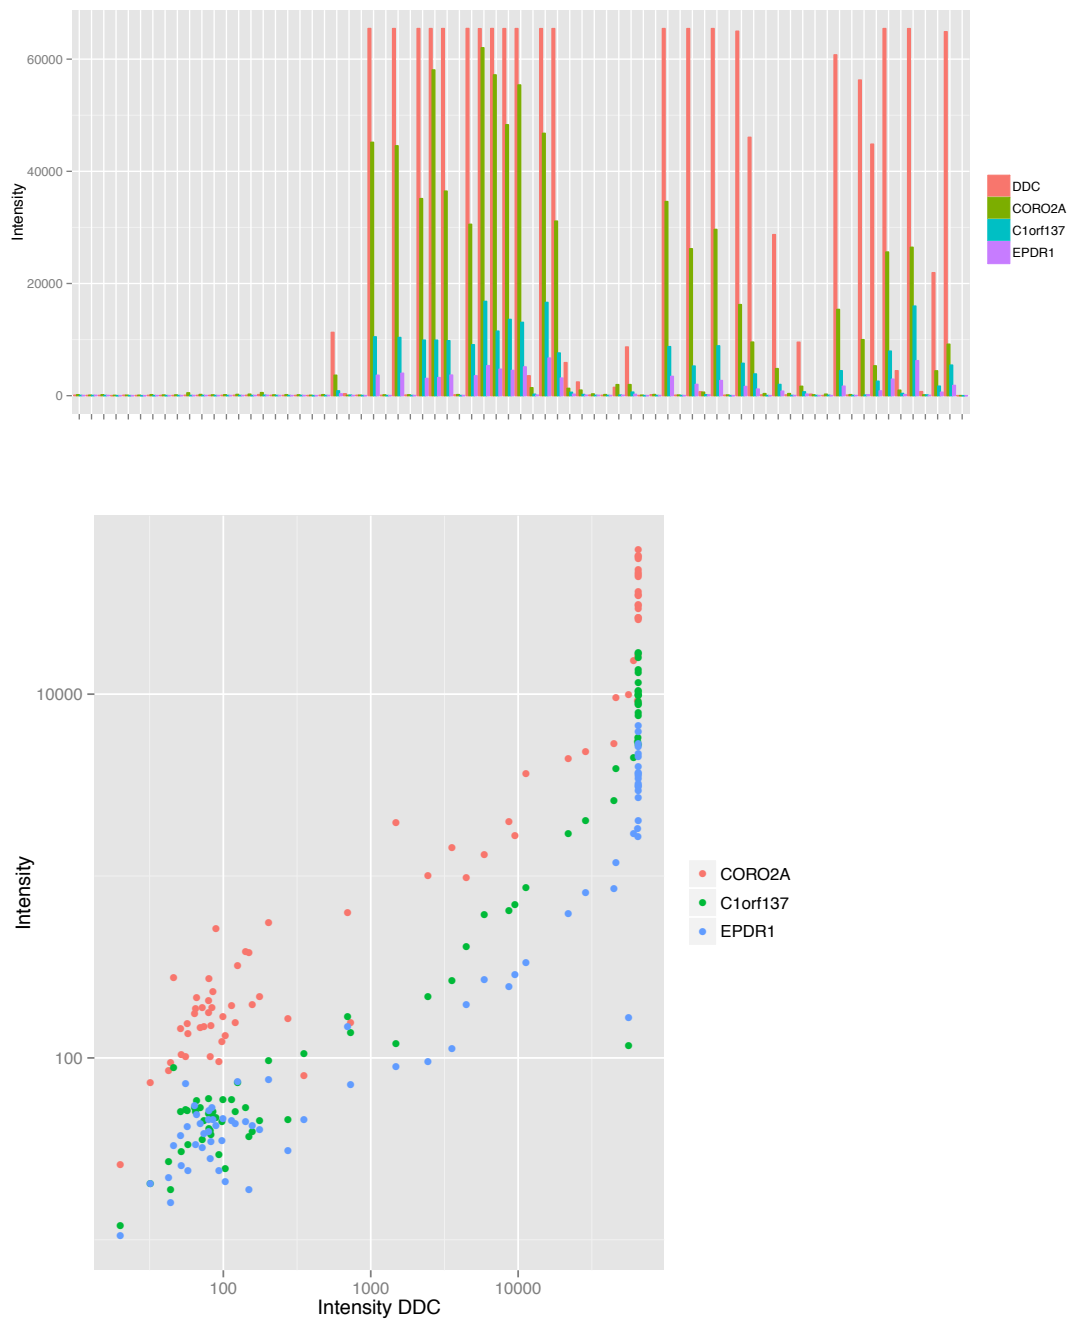

Fig. S8. Printing contamination artifacts exemplified by DDC and adjacent targets.

Correlated protein array signals between DCC, an established APS1 autoantigen, and

nearby located proteins; CORO2AA, C1orf137 and EPDR1. Healthy subjects (n=21) are grouped to the left and patients with APS1 (n=51) to the right in the upper image. Average fluorescence signal intensities for protein duplicates on the array after subtraction of the background signal are shown.

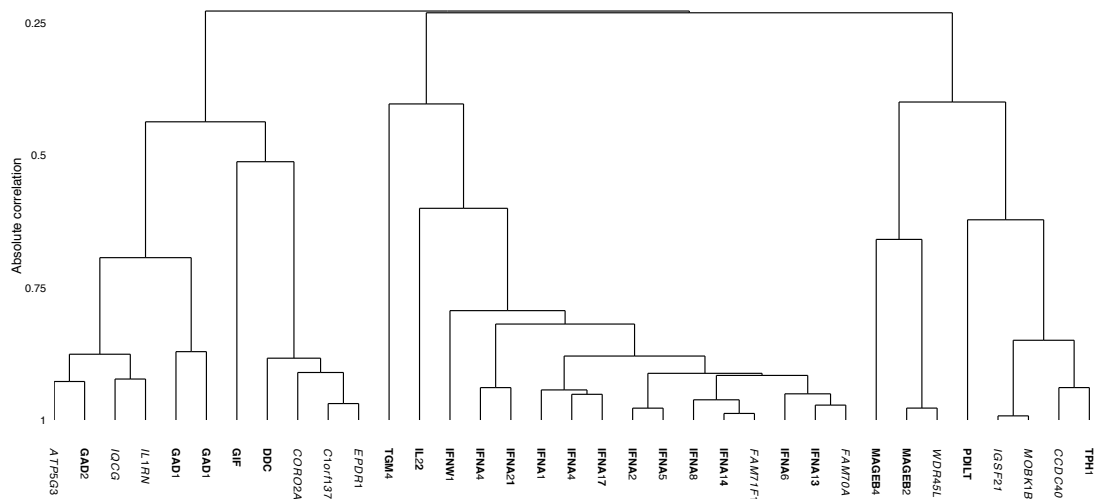

Fig. S9. Identification of printing contamination artifacts in the proteome array data set. Correlations between the top targets in the protein array screen before annotation are shown. Unexpected strong correlations between targets closely located on the array were identified as artifacts (marked in *Italic*) and excluded from the analyses.

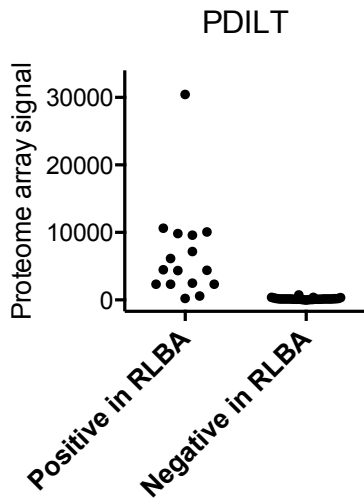

Fig. S10. Validation of PDILT autoantibodies in the APS1 discovery cohort (n=51) using a radio-ligand binding assay (RLBA). Patients that were positive for PDILT autoantibodies in the RLBA are grouped to the left. The cut-off in the RLBA was defined as an index-value of 15. Proteome array signals are shown as the average fluorescence signal intensities for protein duplicates on the array after subtraction of the background signal.

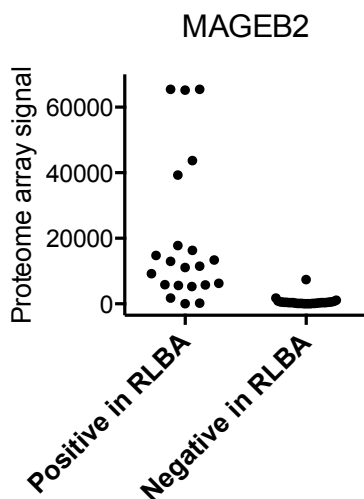

Fig. S11. Validation of MAGEB2 autoantibodies in the APS1 discovery cohort (n=51) using a radio-ligand binding assay (RLBA). Patients that were positive for MAGEB2

autoantibodies in the RLBA are grouped to the left. The cut-off in the RLBA was defined as an index-value of 15. Proteome array signals are shown as the average fluorescence signal intensities for protein duplicates on the array after subtraction of the background signal.

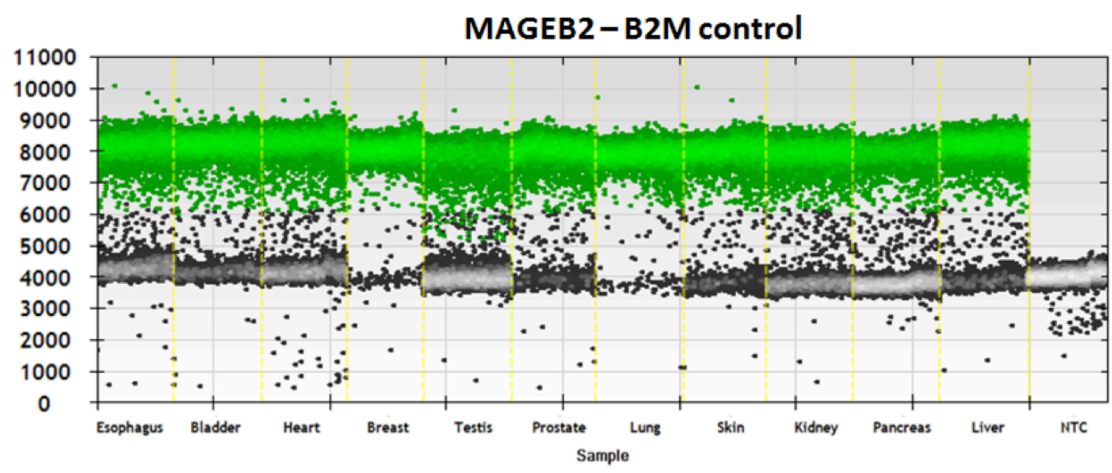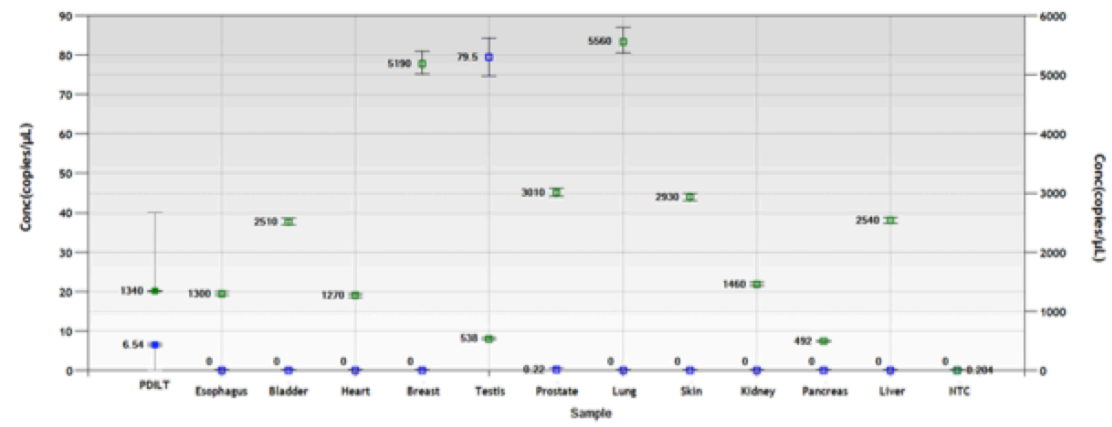

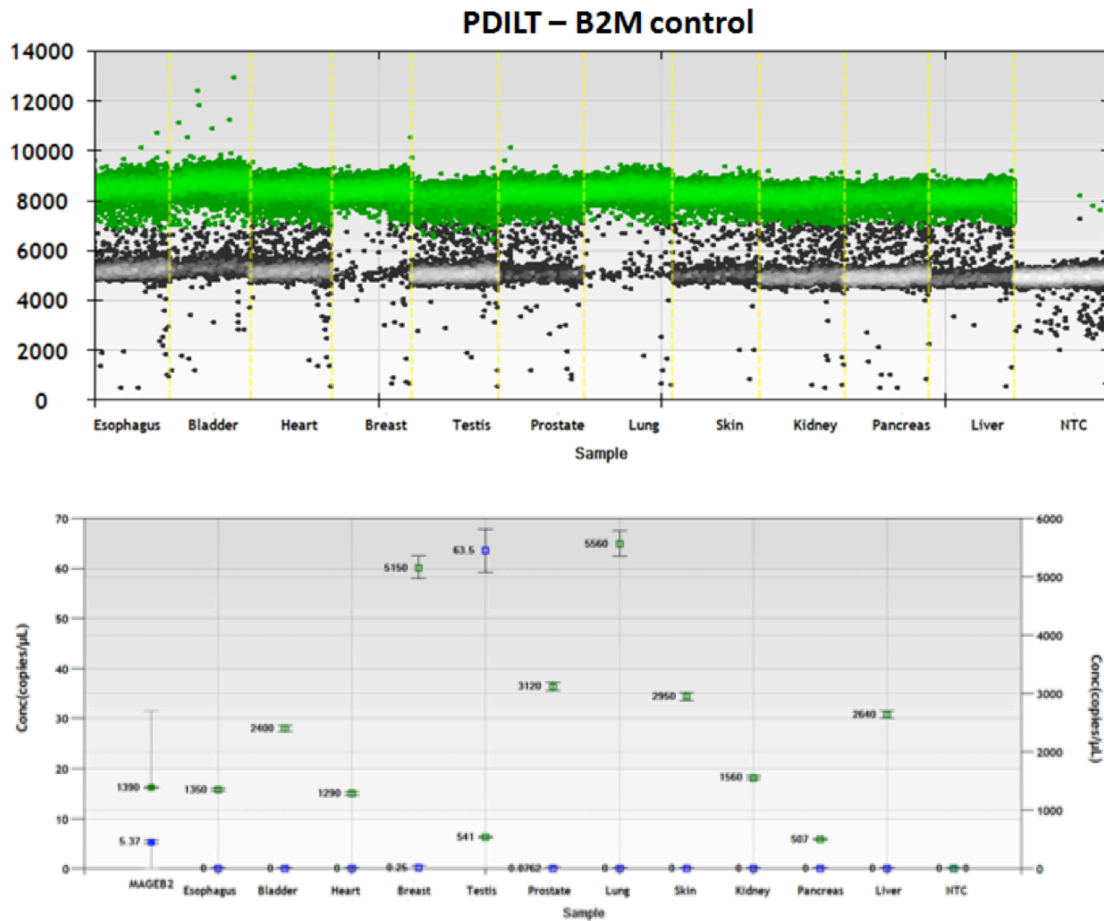

Fig. S12. mRNA levels of MAGEB2 and PDILT were assessed in multiple human tissues by digital droplet PCR. The greatest number of high amplitude events is seen in the testis cDNA sample, and very few or no high amplitude events are seen for the other tissue samples and the *no template control* (NTC). Grey dots denote events with intensities below cut-off. The results for PDILT and MAGEB2 were compared against that of  $\beta$ 2M.

| <b>Autoantigen</b> | <b>Prevalence</b> |     |
|--------------------|-------------------|-----|
| <b>IFNW1</b>       | 47/51             | 92% |
| <b>IFNA1</b>       | 46/51             | 90% |
| <b>DDC</b>         | 37/51             | 73% |
| <b>IL22</b>        | 35/51             | 67% |
| <b>TPH1</b>        | 28/51             | 55% |
| <b>GAD2</b>        | 22/51             | 43% |
| <b>GAD1</b>        | 15/51             | 29% |
| <b>GIF</b>         | 14/51             | 27% |
| <b>IL17A</b>       | 12/51             | 24% |
| <b>KCNRG</b>       | 3/51              | 6%  |
| <b>CYP1A2</b>      | 2/51              | 4%  |
| <b>TSGA10</b>      | 2/51              | 4%  |

Table S1. Prevalence of established autoantibodies in the protein array screen. 51 patients with APS1 were investigated. The upper limit of the normal range was defined as three standard deviations above the average of the healthy control subjects.

| Gene   | Tissue expression, mRNA seq (HPA)                                   |
|--------|---------------------------------------------------------------------|
| TPH1   | Group enriched (colon, duodenum, rectum, small intestine, stomach). |
| DDC    | Tissue enhanced (duodenum, kidney, small intestine).                |
| GAD2   | Tissue enriched (cerebral cortex).                                  |
| GAD1   | Tissue enriched (cerebral cortex).                                  |
| IFNA13 | Not detected.                                                       |
| IL22   | Not detected.                                                       |
| GIF    | Tissue enriched (stomach).                                          |
| MAGEB2 | Tissue enriched (testis).                                           |
| MAGEB4 | Tissue enriched (testis).                                           |
| PDILT  | Group enriched (stomach, testis).                                   |
| TGM4   | Tissue enriched (prostate).                                         |

Table S2. Tissue expression profiles of the major immune targets in the proteome array screen. mRNA sequencing data on gene expression profiles obtained from the Human Protein Atlas, <http://www.proteinatlas.org>. For comparison, among 20,344 genes investigated by the Human Protein Atlas, 2,355 (12%) were classified as being *Tissue enriched*, 1,109 as *Group enriched* (5%), 3,478 (17%) as *Tissue enhanced*, 8,874 (44%) as *Expressed in all*, 2,696 (13%) as *Mixed* and 1,832 (9%) as *Not detected*<sup>39</sup>. Several type 1 interferon species were major immune targets in the patients with APS1 but are here represented by IFNA13 only.

| Best GOs          | GO description                            | Genes                                   | Group count | Total count | P-value (Benjamini corrected) |
|-------------------|-------------------------------------------|-----------------------------------------|-------------|-------------|-------------------------------|
| <b>GO:0042136</b> | neurotransmitter biosynthetic process     | TPH1<br>GAD2<br>GAD1                    | 3           | 16          | 1.05e-05                      |
| <b>GO:0006540</b> | glutamate decarboxylation to succinate    | GAD2<br>GAD1                            | 2           | 2           | 1.23e-05                      |
| <b>GO:0006105</b> | succinate metabolic process               | GAD2<br>GAD1                            | 2           | 2           | 1.23e-05                      |
| <b>GO:0004351</b> | glutamate decarboxylase activity          | GAD2<br>GAD1                            | 2           | 2           | 1.23e-05                      |
| <b>GO:0042133</b> | neurotransmitter metabolic process        | TPH1<br>GAD2<br>GAD1                    | 3           | 32          | 1.86e-05                      |
| <b>GO:0006538</b> | glutamate catabolic process               | GAD2<br>GAD1                            | 2           | 3           | 2.47e-05                      |
| <b>GO:0016831</b> | carboxy-lyase activity                    | GAD2<br>DDC<br>GAD1                     | 3           | 56          | 7.37e-05                      |
| <b>GO:0005615</b> | extracellular space                       | IFNW1<br>IL22<br>IL17A<br>GIF<br>IFNA13 | 5           | 528         | 7.96e-05                      |
| <b>GO:0006519</b> | amino acid and derivate metabolic process | IL22<br>TPH1<br>GAD2<br>DDC<br>GAD1     | 5           | 548         | 8.48e-05                      |
| <b>GO:0019842</b> | vitamin binding                           | GAD2<br>GIF<br>DDC<br>GAD1              | 4           | 245         | 9.17e-05                      |
| <b>GO:0001505</b> | regulation of neurotransmitter levels     | TPH1<br>GAD2                            | 3           | 78          | 0.000117                      |



|                   |                                        |        |   |     |          |
|-------------------|----------------------------------------|--------|---|-----|----------|
|                   |                                        | GAD1   |   |     |          |
| <b>GO:0009308</b> | amine metabolic process                | IL22   | 5 | 636 | 0.000117 |
|                   |                                        | TPH1   |   |     |          |
|                   |                                        | GAD2   |   |     |          |
|                   |                                        | DDC    |   |     |          |
|                   |                                        | GAD1   |   |     |          |
| <b>GO:0007267</b> | cell-cell signaling                    | IL22   | 5 | 640 | 0.000117 |
|                   |                                        | IL17A  |   |     |          |
|                   |                                        | TPH1   |   |     |          |
|                   |                                        | GAD2   |   |     |          |
|                   |                                        | GAD1   |   |     |          |
| <b>GO:0016830</b> | carbon-carbon lyase activity           | GAD2   | 3 | 82  | 0.000117 |
|                   |                                        | DDC    |   |     |          |
|                   |                                        | GAD1   |   |     |          |
| <b>GO:0005132</b> | interferon-alpha/beta receptor binding | IFNW1  | 2 | 9   | 0.000118 |
|                   |                                        | IFNA13 |   |     |          |
| <b>GO:0006807</b> | nitrogen compound metabolic process    | IL22   | 5 | 678 | 0.000134 |
|                   |                                        | TPH1   |   |     |          |
|                   |                                        | GAD2   |   |     |          |
|                   |                                        | DDC    |   |     |          |
|                   |                                        | GAD1   |   |     |          |
| <b>GO:0005125</b> | cytokine activity                      | IFNW1  | 4 | 310 | 0.000137 |
|                   |                                        | IL22   |   |     |          |
|                   |                                        | IL17A  |   |     |          |
|                   |                                        | IFNA13 |   |     |          |
| <b>GO:0019752</b> | carboxylic acid metabolic process      | IL22   | 5 | 795 | 0.000238 |
|                   |                                        | TPH1   |   |     |          |
|                   |                                        | GAD2   |   |     |          |
|                   |                                        | DDC    |   |     |          |
|                   |                                        | GAD1   |   |     |          |
| <b>GO:0006082</b> | organic acid metabolic process         | IL22   | 5 | 798 | 0.000238 |
|                   |                                        | TPH1   |   |     |          |
|                   |                                        | GAD2   |   |     |          |
|                   |                                        | DDC    |   |     |          |
|                   |                                        | GAD1   |   |     |          |
| <b>GO:0030170</b> | pyridoxal phosphate binding            | GAD2   | 3 | 117 | 0.000238 |
|                   |                                        | DDC    |   |     |          |
|                   |                                        | GAD1   |   |     |          |

|                   |                                                         |                                         |   |     |          |
|-------------------|---------------------------------------------------------|-----------------------------------------|---|-----|----------|
| <b>GO:0043648</b> | dicarboxylic acid metabolic process                     | GAD2<br>GAD1                            | 2 | 16  | 0.000268 |
| <b>GO:0006536</b> | glutamate metabolic process                             | GAD2<br>GAD1                            | 2 | 16  | 0.000268 |
| <b>GO:0044421</b> | extracellular region part                               | IFNW1<br>IL22<br>IL17A<br>GIF<br>IFNA13 | 5 | 910 | 0.000386 |
| <b>GO:0009065</b> | glutamine family amino acid catabolic process           | GAD2<br>GAD1                            | 2 | 20  | 0.000389 |
| <b>GO:0006520</b> | amino acid metabolic process                            | IL22<br>TPH1<br>GAD2<br>GAD1            | 4 | 474 | 0.00049  |
| <b>GO:0006100</b> | tricarboxylic acid cycle intermediate metabolic process | GAD2<br>GAD1                            | 2 | 32  | 0.000934 |
| <b>GO:0042401</b> | biogenic amine biosynthetic process                     | TPH1<br>DDC                             | 2 | 34  | 0.000982 |
| <b>GO:0006952</b> | defense response                                        | IFNW1<br>IL22<br>IL17A<br>IFNA13        | 4 | 584 | 0.000982 |
| <b>GO:0042398</b> | amino acid derivate biosynthetic process                | TPH1<br>DDC                             | 2 | 42  | 0.00145  |
| <b>GO:0016829</b> | lyase activity                                          | GAD2<br>DDC<br>GAD1                     | 3 | 278 | 0.00207  |

Table S3. Gene ontology terms showing significant overrepresentation in established APS1 autoantigens present on the protein array (TPH1, DDC, GAD2, GAD1, IFNA13, IL22, GIF, MAGEB2, MAGEB4, PDILT, TGM4, IFNW1, IL17A, KCNKG, CYP1A2, TSGA10). Associated GO terms were retrieved from the GOa\_human database. Minimal length of considered GO paths was set to 3 (default), and top 30 most significant were

reported. 'False discovery rate' according to Benjamini was used for correcting p-values for multiple testing. Results were not clustered.
